# Supplementary material for: DSAP: deep-sequencing small RNA analysis pipeline
Source: PubMed Central journal article supplement — Nucleic Acids Res. 2010 May 16;38(Web Server issue):W385–91. doi: 10.1093/nar/gkq392 (PMC2896168; doi:10.1093/nar/gkq392), 2010-05-16
Supplement: gkq392_1.pdf [file gkq392_1.pdf]

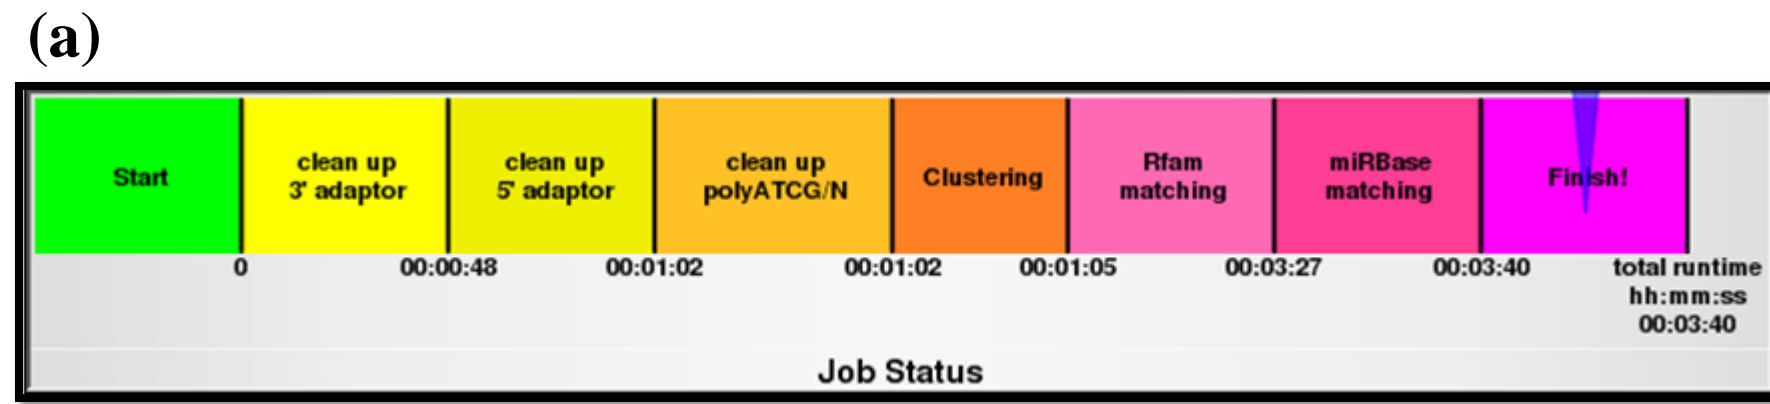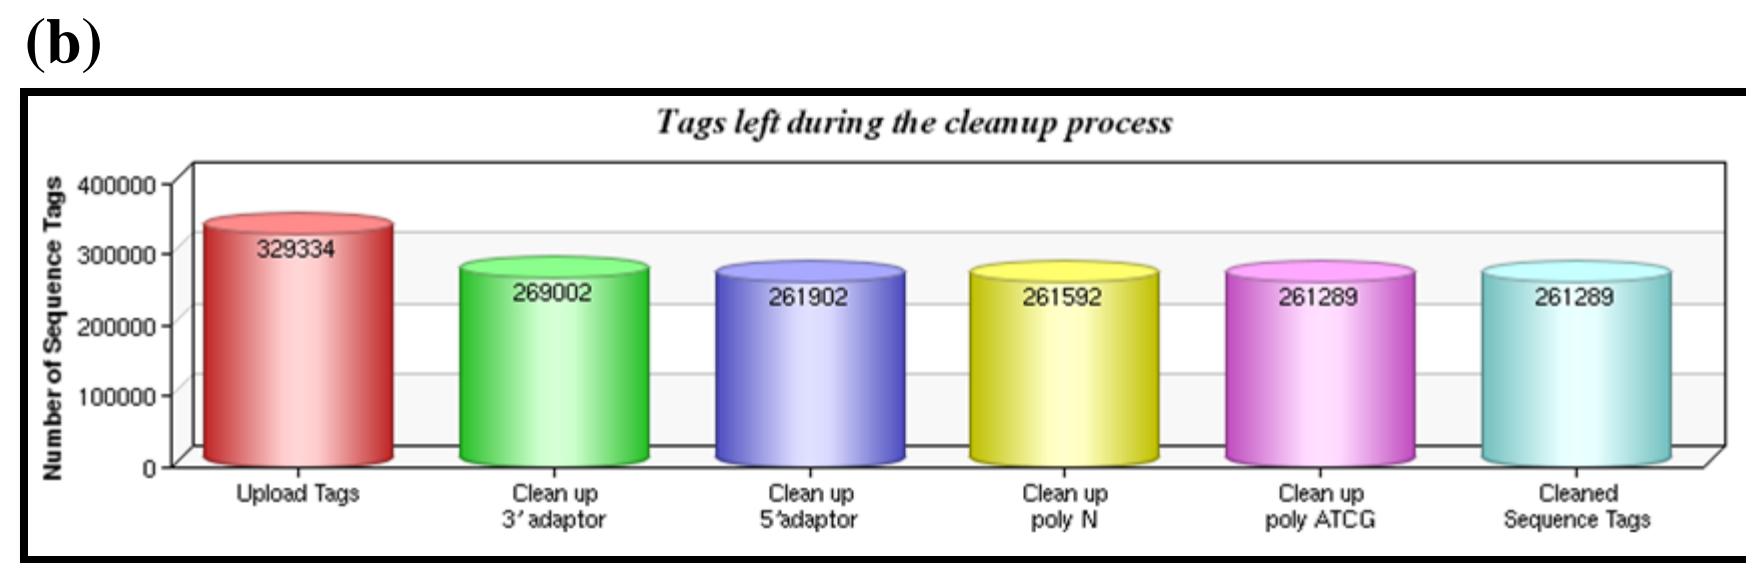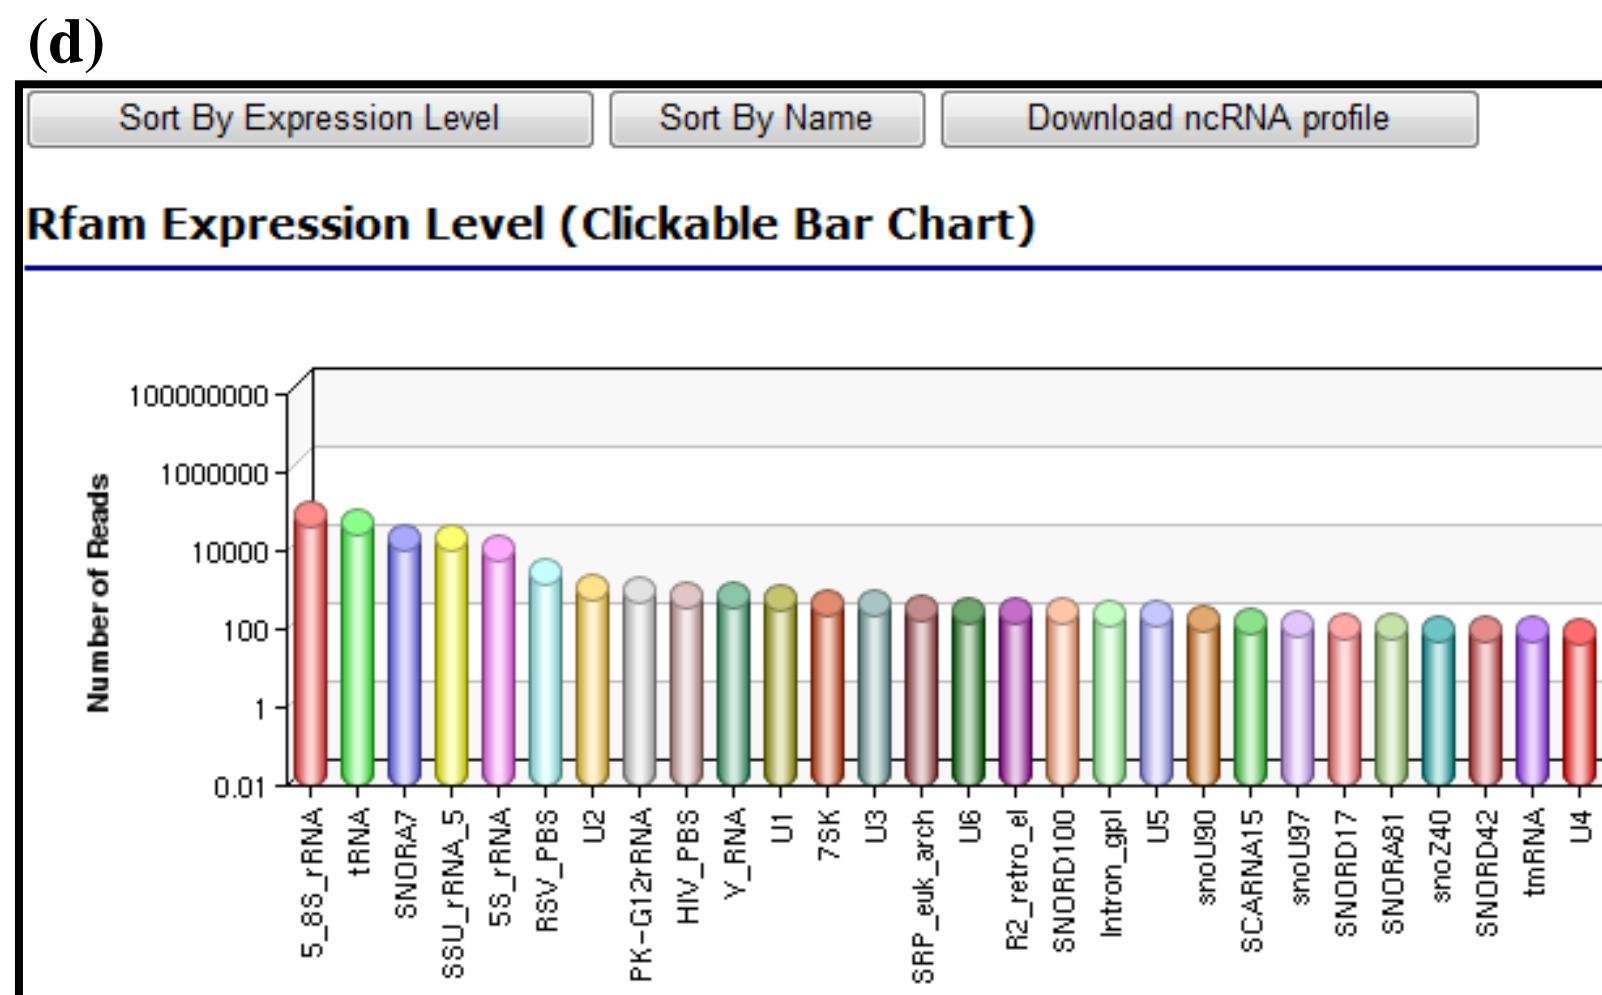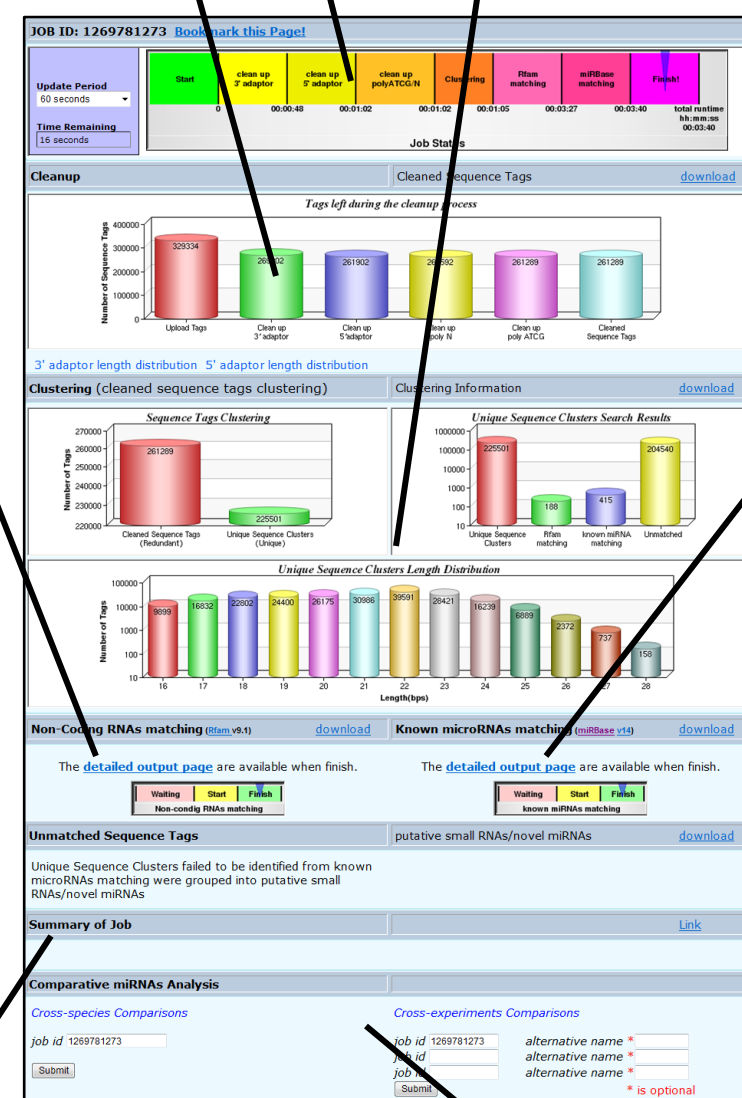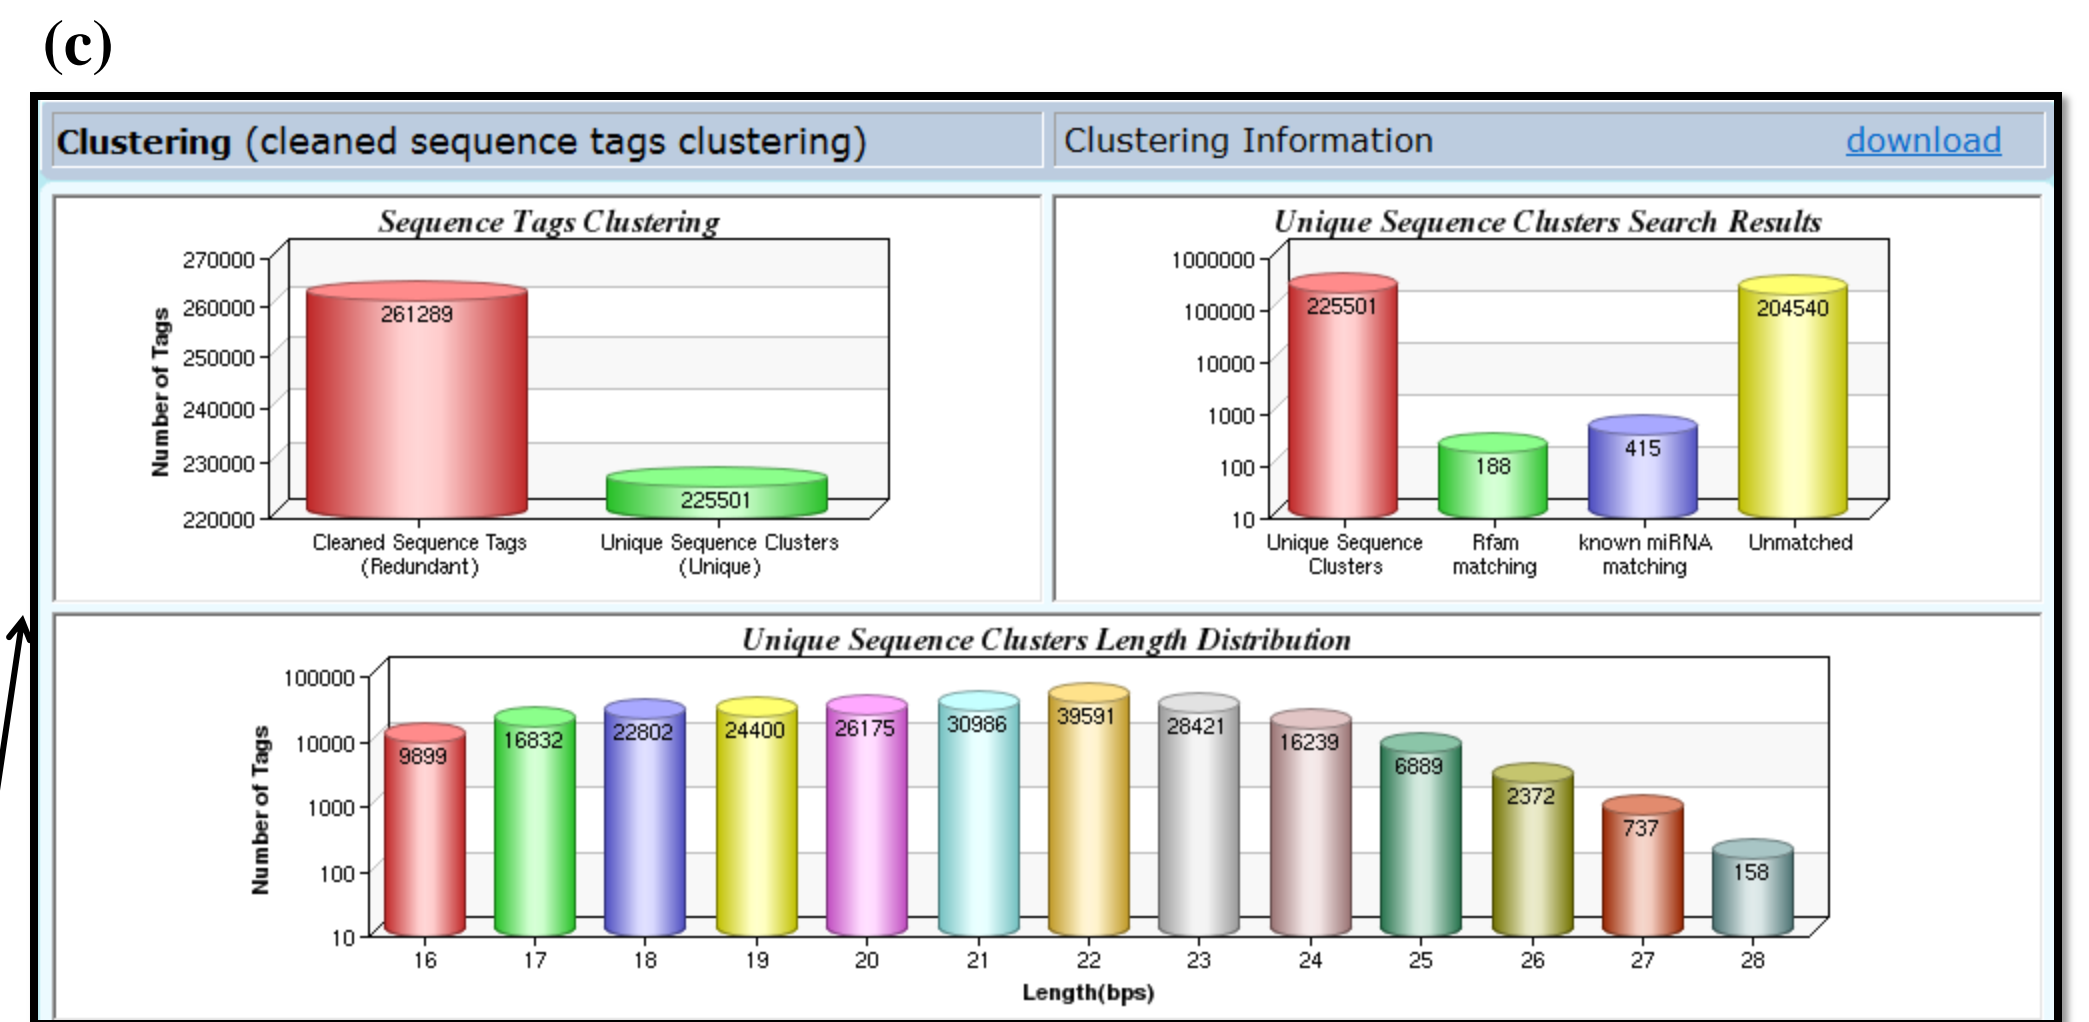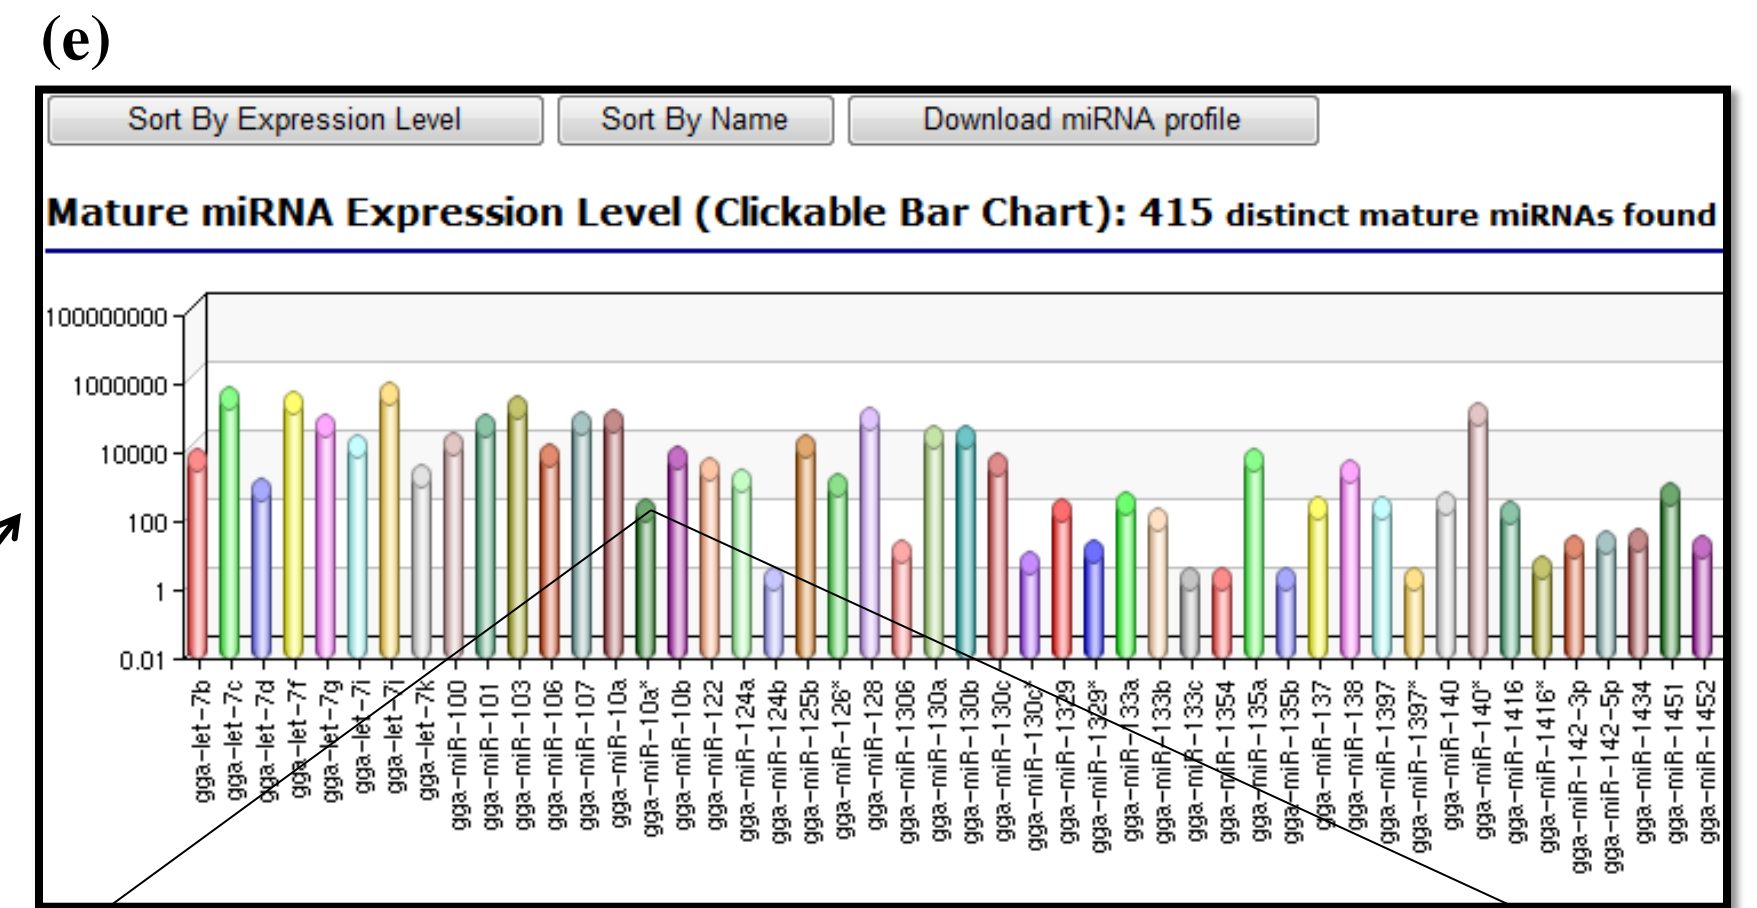

| miRBase Best Hit/Cluster ID | Sort by Read Counts | Sort by Length | Sort by Sequence                      |
|-----------------------------|---------------------|----------------|---------------------------------------|
| pre-gga-miR-10a             |                     | 74             | -cuauaugUACCCUGUAGAUCCGAAUUUGuaaagga  |
| gga-miR-10a                 |                     | 22             | -----UACCCUGUAGAUCCGAAUUUGU-----      |
| 173510                      | 26443               | 22             | -TACCCTGTAGATCCGAATTTGTG-----         |
| 173519                      | 10431               | 23             | -----TACCCTGTAGATCCGAATTTGTg-----     |
| 173520                      | 523                 | 24             | -----TACCCTGTAGATCCGAATTTGTga-----    |
| 173529                      | 360                 | 24             | -----TACCCTGTAGATCCGAATTTGTgt-----    |
| 173511                      | 135                 | 23             | -----TACCCTGTAGATCCGAATTTGTa-----     |
| 173532                      | 84                  | 23             | -----TACCCTGTAGATCCGAATTTGTt-----     |
| 173512                      | 56                  | 24             | -----TACCCTGTAGATCCGAATTTGTaa-----    |
| 173521                      | 18                  | 25             | -----TACCCTGTAGATCCGAATTTGTgaa-----   |
| 173516                      | 5                   | 23             | -----TACCCTGTAGATCCGAATTTGTc-----     |
| 173527                      | 5                   | 27             | -----TACCCTGTAGATCCGAATTTGTggaac----- |

**(f)**

|                                                                                              |            |
|----------------------------------------------------------------------------------------------|------------|
| JOB_ID                                                                                       | 1268806910 |
| No. of total reads                                                                           | 3257227    |
| No. of sequence tags                                                                         | 329334     |
| No. of tags after 3'adaptor clean up                                                         | 269002     |
| No. of tags after 5'adaptor Clean up                                                         | 261902     |
| No. of tags after poly N cleanup                                                             | 261592     |
| No. of tags after poly-ATCG Clean up                                                         | 261289     |
| No. of cleaned sequence tags                                                                 | 261289     |
| No. of reads in cleaned sequence tags                                                        | 3076497    |
| Percentage of reliable reads #                                                               | 94.45      |
| #Percentage of reliable reads=(No. of reads in cleaned sequence tags/No. of total reads)*100 |            |
| No. of Unique Sequence Clusters (USC)                                                        | 225501     |
| No. of matched ncRNA in Rfam                                                                 | 188        |
| No. of USC matched to Rfam                                                                   | 18406      |
| No. of total reads matched to Rfam                                                           | 95979      |
| Percentage of reads matched to Rfam                                                          | 3.12       |
| No. of matched miRNA in miRBase                                                              | 415        |
| No. of USC matched to miRBase                                                                | 2555       |
| No. of total reads matched to miRBase                                                        | 1687442    |
| Percentage of reads matched to miRNA                                                         | 54.85      |
| USC Unmatched                                                                                | 204540     |

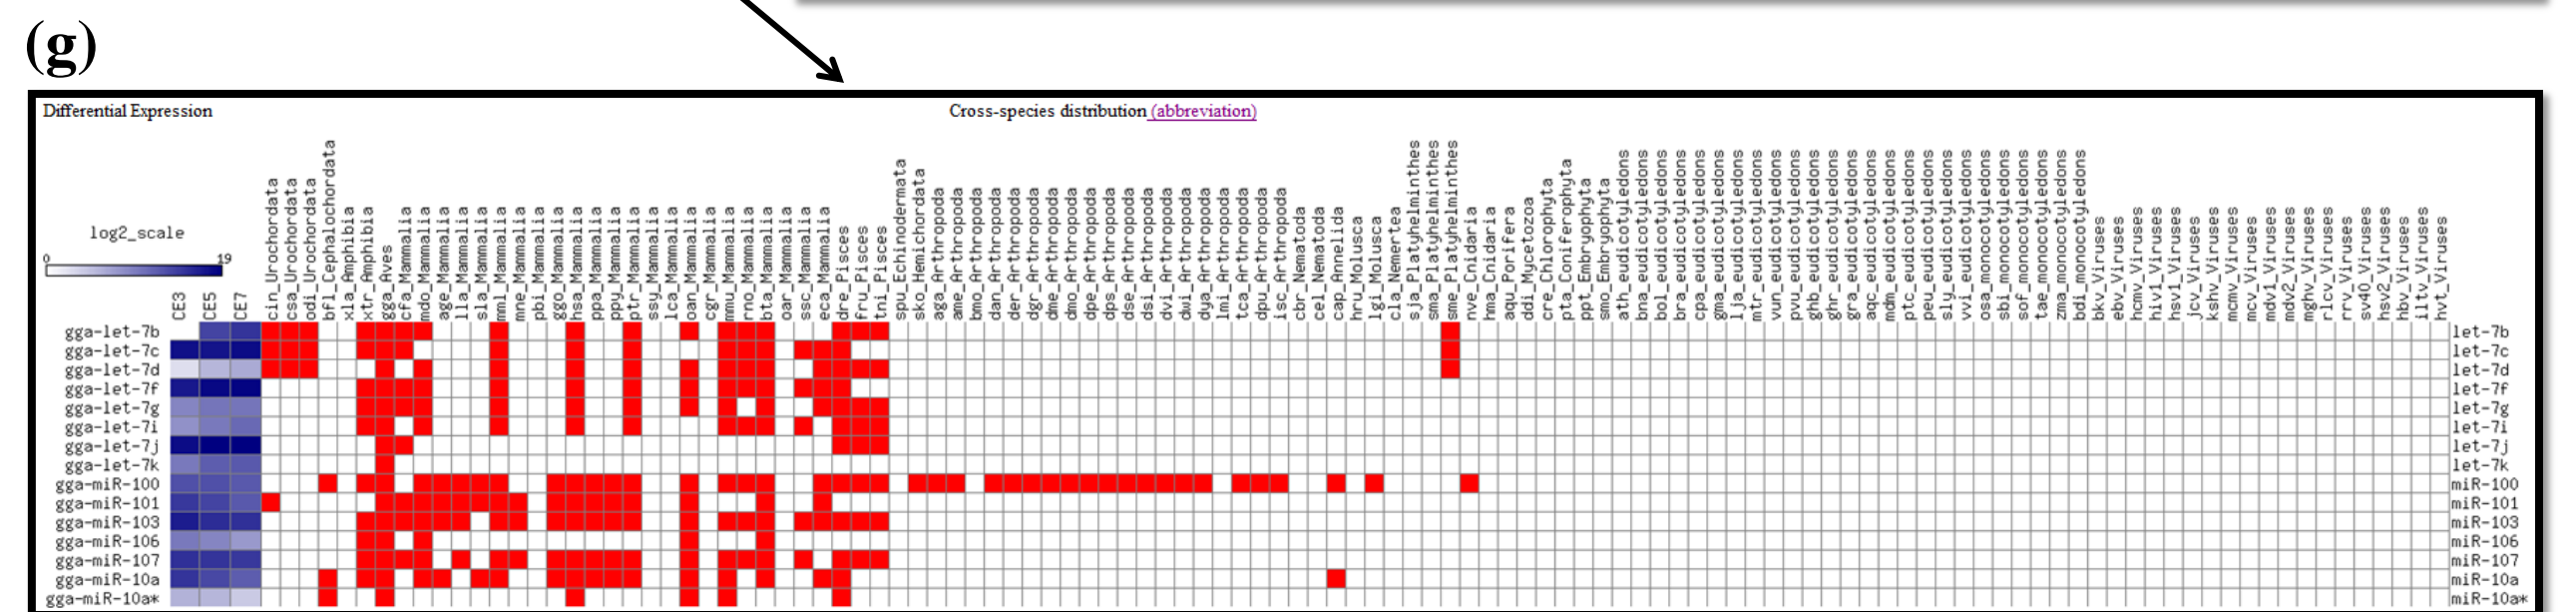

Figure S1 - Output pages of DSAP.

All the results of DSAP are summarized in figures and clickable charts for better visualization. Figure S1a shows the current status of the process and exact run time of each step in a dynamic meter graph. Figure S1b shows a bar chart dynamically recording the number of sequence tags during the cleanup process. Figure S1c shows the clustering state of the cleaned sequence tags and provides each unique sequence cluster and its member information in a tab-delimited file. Figure S1d and S1e summarize the results of the unique sequence clusters matched to Rfam and miRBase respectively. Figure S1f shows a summary of the job. Figure S1g shows cross-experiment and cross-species miRNA distribution comparison results through a color scaling matrix.

| miRNA       | CE5    | CE7    | CE9    |
|-------------|--------|--------|--------|
| gga-let-7b  | 1      | 12352  | 29903  |
| gga-let-7c  | 163164 | 156621 | 198263 |
| gga-let-7d  | 6      | 44     | 81     |
| gga-let-7f  | 128541 | 255562 | 346444 |
| gga-let-7g  | 532    | 1156   | 1075   |
| gga-let-7i  | 250    | 936    | 1877   |
| gga-let-7j  | 232980 | 37351  | 446116 |
| gga-let-7k  | 837    | 3414   | 4844   |
| gga-miR-100 | 7358   | 6871   | 4168   |
| gga-miR-101 | 23497  | 12104  | 4654   |
| gga-miR-103 | 89271  | 41329  | 34030  |

Figure S2 - Input format for comparative miRNA analysis.

The first column is a miRNA descriptor using the standard format as in miRBase. The remaining columns are numeric data such as read counts or fold difference with headings to indicate each individual experiment.
